# Supplementary material for: Can ferroelectric polarization explain the high performance of hybrid halide perovskite solar cells?
Source: Royal Society of Chemistry journal article supplement (doi:10.1039/c5cp07117h), 2015-11-23
Supplement: c5cp07117h1.pdf [file c5cp07117h1.pdf]

## Supplementary Information

# Can Ferroelectric Polarization Explain the High Performance of Hybrid Perovskite Solar Cells?

Tejas S. Sherkar\*, L. Jan Anton Koster

*Zernike Institute for Advanced Materials, University of Groningen,  
Nijenborgh 4, 9747AG, Groningen, The Netherlands.*

Table S1: Parameters used in numerical simulation of perovskite solar cell.

| Parameter                                 | Symbol         |
|-------------------------------------------|----------------|
| Concentration (electron; hole)            | $n; p$         |
| Mobility (electron; hole)                 | $\mu_n; \mu_p$ |
| Elementary charge                         | $q$            |
| Boltzmann constant                        | $k$            |
| Solar cell temperature                    | $T$            |
| Dielectric permittivity of the perovskite | $\epsilon$     |
| Bimolecular recombination pre-factor      | $\gamma_{pre}$ |
| Fill Factor                               | FF             |

## A Mobility Study

We performed calculations for different charge carrier mobilities in the perovskite solar cell. For all cases, the open-circuit voltage ( $V_{OC}$ ) remained unchanged and the change in short-circuit current ( $J_{SC}$ ) was only marginal. The mobility influenced significantly the fill factor (FF) of the solar cell and the results are shown in Figure S1.

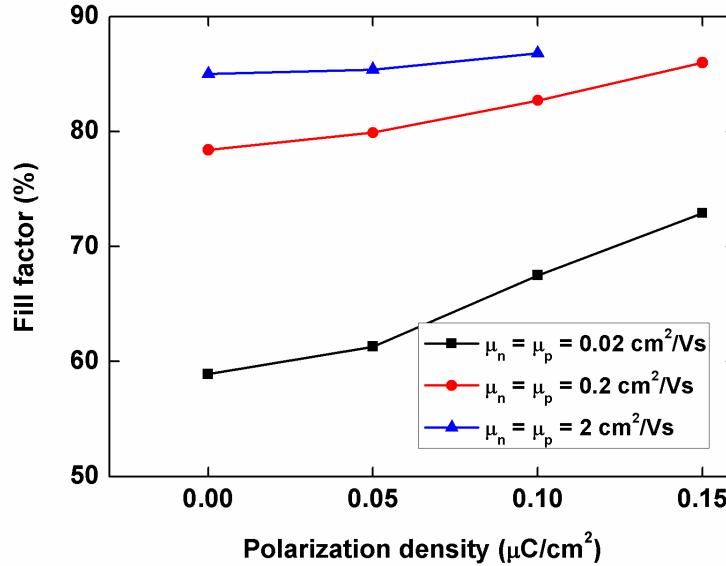

Figure S1: Variation of fill factor (FF) with polarization density for different charge carrier mobilities in the perovskite.

The bimolecular recombination rate expression is given by

$$R = \gamma np, \quad (\text{S1})$$

where the  $\gamma$  is the rate constant, given by<sup>1</sup>

$$\gamma = \gamma_{pre} \frac{q}{\epsilon} (\mu_n + \mu_p), \quad (\text{S2})$$

which scales proportionally with mobility of charge carriers.

The variation of fill factor (FF) for different charge mobilities are compared by keeping the rate constant ( $\gamma$ ) fixed. This is made possible by changing the value of  $\gamma_{pre}$  accordingly. The value of  $\gamma_{pre}$  used for mobilities 0.02 cm<sup>2</sup>/Vs, 0.2 cm<sup>2</sup>/Vs and 2 cm<sup>2</sup>/Vs is 1, 0.1 and 0.01 respectively.

## B Idealized Limit for Fill Factor (FF)

The limit for the fill factor (FF) for an idealized solar cell with a given  $V_{OC}$  can be calculated by<sup>2</sup>

$$FF = \frac{v_{oc} - \ln(v_{oc} + 0.72)}{v_{oc} + 1} \quad (\text{S3})$$

where  $v_{oc}$  is the open-circuit voltage normalized to  $kT/q$ . Hence for a open circuit voltage of  $V_{OC} = 0.93$  V, the idealized limit for FF is 88.1%.

## References

- [1] L. J. A. Koster, O. Stenzel, S. D. Oosterhout, M. M. Wienk, V. Schmidt and R. A. Janssen, *Adv. Energy Mater.*, 2013, **3**, 615–621.
- [2] M. A. Green, *Solid-State Electronics*, 1981, **24**, 788–789.
